# Supplementary material
Source: PubMed Central journal article supplement (PMC9184302)
Supplement: NIHMS1766933-supplement-1.pdf [file NIHMS1766933-supplement-1.pdf]

Supplemental Table 1: Self-monitoring, behavioral, and written homework assignments by treatment condition

| Self-Monitoring                                                                                                                                      |                                                                                                                                                      | Behavioral Homework                                                          |                                                                              | Written Homework                                                                                                            |                                                                                 |
|------------------------------------------------------------------------------------------------------------------------------------------------------|------------------------------------------------------------------------------------------------------------------------------------------------------|------------------------------------------------------------------------------|------------------------------------------------------------------------------|-----------------------------------------------------------------------------------------------------------------------------|---------------------------------------------------------------------------------|
| MABT                                                                                                                                                 | CBT                                                                                                                                                  | MABT                                                                         | CBT                                                                          | MABT                                                                                                                        | CBT                                                                             |
| All eating episodes <ul style="list-style-type: none"> <li>• Time</li> <li>• Food consumed</li> <li>• Location</li> <li>• Loss of control</li> </ul> | All eating episodes <ul style="list-style-type: none"> <li>• Time</li> <li>• Food consumed</li> <li>• Location</li> <li>• Loss of control</li> </ul> | Eating regular meals and snacks (3 meals and 1-3 snacks per day)             | Eating regular meals and snacks (3 meals and 1-3 snacks per day)             | Identifying pros and cons of eating disorder behaviors                                                                      | Reflection on and personalization of CBT treatment model                        |
|                                                                                                                                                      |                                                                                                                                                      | Avoid at-home weighing                                                       | Avoid at-home weighing                                                       | Recording of distressing internal experiences (thoughts, emotions) and behavioral response to these experiences             | Identification of alternative activities to implement                           |
| All compensatory behaviors (e.g., vomiting, laxative/diuretic misuse, driven exercise)                                                               | All compensatory behaviors (e.g., vomiting, laxative/diuretic misuse, driven exercise)                                                               | Practicing urge management strategies (urge surfing, alternative activities) | Practicing urge management strategies (urge surfing, alternative activities) | Identification of alternative activities to implement                                                                       | Identifying pros and cons of changing eating disorder behaviors                 |
|                                                                                                                                                      |                                                                                                                                                      | Implement plan to reduce compensatory behaviors                              | Implement plan to reduce compensatory behaviors                              | Values clarity pie chart exercise and reflection on valued life domains. Identification of barriers to living a valued life | Overvaluation of shape and weight pie chart exercise                            |
| Emotions that occur during eating episodes and compensatory behaviors                                                                                | Context and comments relevant to eating episodes and compensatory behaviors                                                                          | Engage in values-consistent activities                                       | Implement changes to eating style to formalize eating episodes               | Short- and long-term goals to build up valued life domains                                                                  | Identification of and monitoring engagement in other domains of self-evaluation |
|                                                                                                                                                      |                                                                                                                                                      | Implement alternative emotion regulation strategies to cope with             | Increase engagement in other domains of self-evaluation                      | Identifying triggers for binge eating episodes and identifying alternative                                                  | Tracking of shape checking and comparison making                                |

|                                                                             |  |                                                                                                          |                                                                                     |                                                                                                                                             |                                                                                                                   |
|-----------------------------------------------------------------------------|--|----------------------------------------------------------------------------------------------------------|-------------------------------------------------------------------------------------|---------------------------------------------------------------------------------------------------------------------------------------------|-------------------------------------------------------------------------------------------------------------------|
|                                                                             |  | emotional triggers for binge eating episodes                                                             |                                                                                     | emotion regulation strategies                                                                                                               |                                                                                                                   |
| Context and comments relevant to eating episodes and compensatory behaviors |  | Reduce lingering dietary restriction (e.g., increasing portion sizes and macronutrient variety of meals) | Reduce engagement in shape checking behaviors by implementing identified strategies | Monitoring the relative efficacy of emotion regulation strategies<br>Developing food exposure hierarchy and plan for at-home food exposures | Identifying triggers for shape checking and identifying strategies to reduce shape checking and comparison making |
|                                                                             |  | At-home food exposures                                                                                   | Dietary rule break experiments                                                      | Tracking use of dropping the rope when having negative internal experiences                                                                 |                                                                                                                   |
|                                                                             |  |                                                                                                          |                                                                                     | Identifying high risk for relapse situations and developing a relapse prevention plan                                                       | Completion of binge analysis and proactive problem solving                                                        |
